# Supplementary material for: Surface Plasmon Enhanced Light Scattering Biosensing: Size Dependence on the Gold Nanoparticle Tag
Source: MDPI journal article supplement (doi:10.3390/s19020323), 2019-01-15
Supplement: s1 [file s1]

Supporting Information

# Surface Plasmon Enhanced Light Scattering Biosensing: Size Dependence on the Gold Nanoparticle Tag

**Chih-Tsung Yang**<sup>1</sup>, **Yi Xu**<sup>2,3</sup>, **Mohammad Pourhassan-Moghaddam**<sup>4,5</sup>, **Duy Phu Tran**<sup>1</sup>, **Lin Wu**<sup>2</sup>,  
**Xin Zhou**<sup>6</sup> and **Benjamin Thierry**<sup>1,\*</sup>

<sup>1</sup> Future Industries Institute and ARC Centre of Excellence in Convergent Bio and Nano Science and Technology, University of South Australia, Mawson Lakes Campus, Mawson Lakes, 5095, Australia; chih-tsung.yang@unisa.edu.au (C.-T.Y.); duy.tran@unisa.edu.au (D.T.)

<sup>2</sup> Electronics and Photonics Department, Institute of High Performance Computing, Agency for Science, Technology, and Research (A\*STAR) 138632, Singapore; yi\_xu@mymail.sutd.edu.sg (Y.X.); wul@ihpc.a-star.edu.sg (L.W.)

<sup>3</sup> SUTD-MIT International Design Center & Science and Math Cluster, Singapore University of Technology and Design, 487372, Singapore

<sup>4</sup> School of Biomedical Engineering, University of Technology Sydney, Sydney, 2007, Australia; pourhassanmo@gmail.com

<sup>5</sup> Institute for Biomedical Materials and Devices (IBMD), Faculty of Science, University of Technology Sydney, Sydney, NSW, 2007, Australia

<sup>6</sup> Institute of Comparative Medicine, Yangzhou University, Yangzhou 225009, China; zhou\_xin@126.com

\* Correspondence: benjamin.thierry@unisa.edu.au

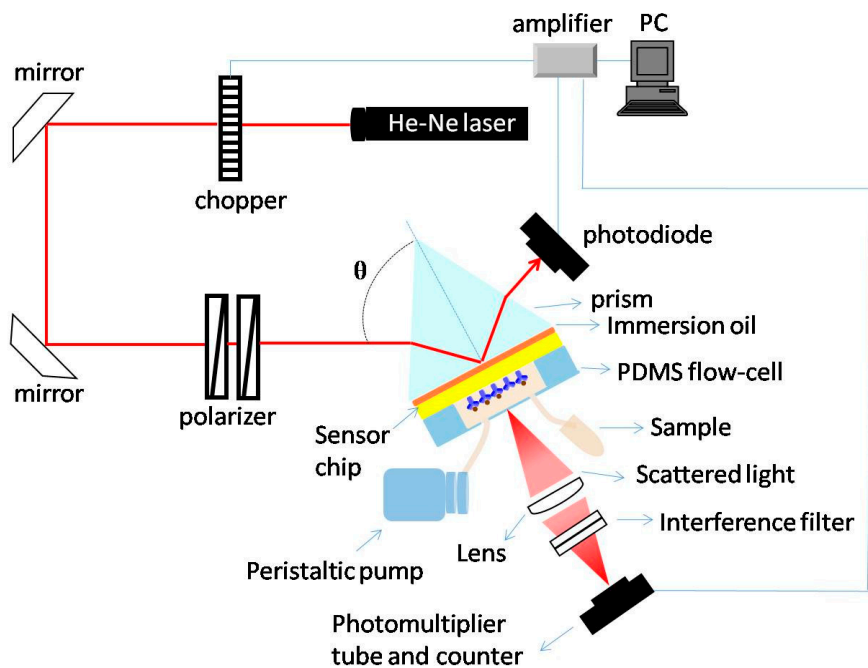

Figure S1. Optical setup of SP-LS in this study.

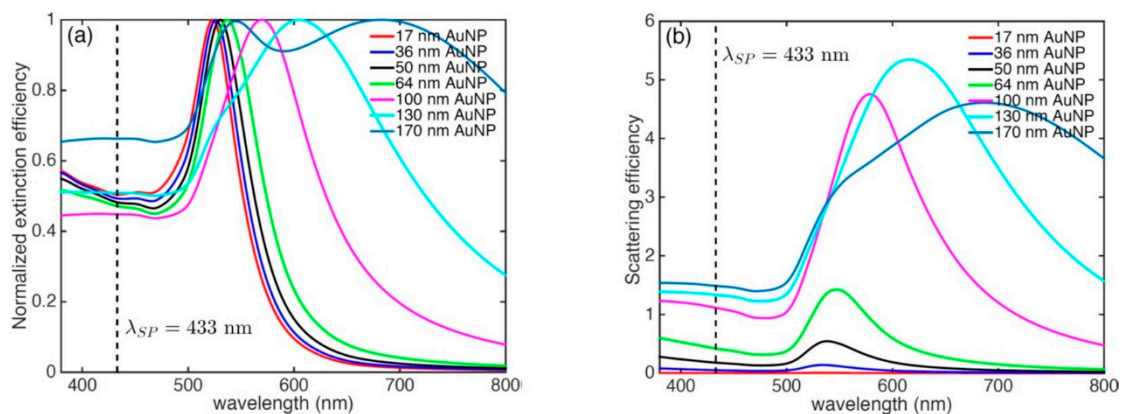

Figure S2. Calculated spectra for (a) normalized extinction efficiency  $Q_{ext}$  and (b) scattering efficiency  $Q_{sca}$  for different sized AuNPs.

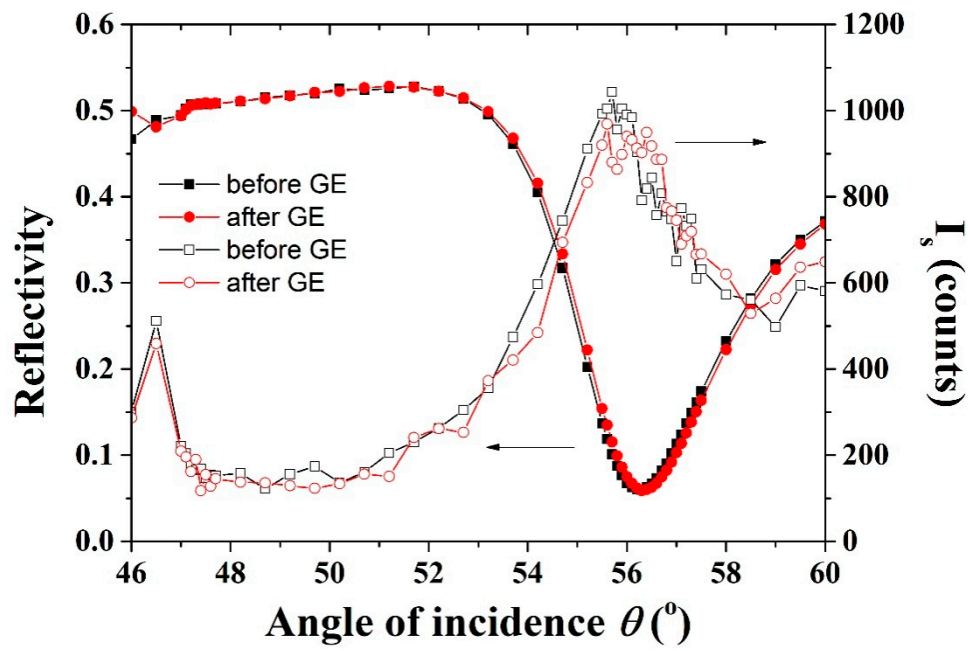

**Figure S3.** Control experiment for goat anti-mouse IgG functionalized SPR sensor surface exposed to GE reagent for 5 min and then measured by SP-LS. No signal enhancement is observed.
